# Supplementary material
Source: publisher figshare collection journal article supplement (https://gsajournals.figshare.com/articles/dataset/_/7075178)
Supplement: Supplementary file 1 [file 1]

## Sheet: Table S2
Genotype	Food type	Replicate	Count						fraction survivors (relative to number of embryos)
			Embryo	L1	L2	L3	Pupa	Adult	Embryo	L1	L2	L3	Pupa	Adult
dib[2] mutant	Normal fly food (no 20E)	1	50	0	0	0	0	0	1	0	0	0	0	0		L1:	1st instar larva
		2	50	0	0	0	0	0	1	0	0	0	0	0		L2:	2nd instar larva
		3	50	0	0	0	0	0	1	0	0	0	0	0		L3:	3rd instar larva
		Average							1	0	0	0	0	0
		Standard deviation							0	0	0	0	0	0		phm22>	phm22-Gal4
		Standard error							0	0	0	0	0	0		dib	disembodied gene
	Normal fly food + 20E	1	50	37	32	28	27	25	1	0.74	0.64	0.56	0.54	0.5		phm	phantom gene
		2	50	39	36	36	32	28	1	0.78	0.72	0.72	0.64	0.56
		3	50	36	33	31	28	26	1	0.72	0.66	0.62	0.56	0.52
		Average							1	0.746667	0.673333	0.633333	0.58	0.526667
		Standard deviation							0	0.0305505	0.0416333	0.080829	0.052915	0.0305505
		Standard error							0	0.0176383	0.024037	0.0466667	0.0305505	0.0176383
phm22>dib-RNAi	Normal fly food (no 20E)	1	50	49	46	41	3	0	1	0.98	0.92	0.82	0.06	0
		2	50	50	47	43	5	3	1	1	0.94	0.86	0.1	0.06
		3	50	49	44	40	4	0	1	0.98	0.88	0.8	0.08	0
		Average							1	0.986667	0.913333	0.826667	0.08	0.02
		Standard deviation							0	0.011547	0.0305505	0.0305505	0.02	0.034641
		Standard error							0	0.00666667	0.0176383	0.0176383	0.011547	0.02
	Normal fly food + 20E	1	50	50	48	43	41	38	1	1	0.96	0.86	0.82	0.76
		2	50	50	45	42	42	37	1	1	0.9	0.84	0.84	0.74
		3	50	49	46	44	40	38	1	0.98	0.92	0.88	0.8	0.76
		Average							1	0.993333	0.926667	0.86	0.82	0.753333
		Standard deviation							0	0.011547	0.0305505	0.02	0.02	0.011547
		Standard error							0	0.00666667	0.0176383	0.011547	0.011547	0.00666667
spok_DmC>U6-dib[gR1]	Normal fly food (no 20E)	1	50	48	44	41	2	0	1	0.96	0.88	0.82	0.04	0
		2	50	49	43	42	0	0	1	0.98	0.86	0.84	0	0
		3	50	47	39	38	5	0	1	0.94	0.78	0.76	0.1	0
		Average							1	0.96	0.84	0.806667	0.0466667	0
		Standard deviation							0	0.02	0.052915	0.0416333	0.0503322	0
		Standard error							0	0.011547	0.0305505	0.024037	0.0290593	0
	Normal fly food + 20E	1	50	50	45	41	39	36	1	1	0.9	0.82	0.78	0.72
		2	50	49	42	40	38	38	1	0.98	0.84	0.8	0.76	0.76
		3	50	50	44	39	35	32	1	1	0.88	0.78	0.7	0.64
		Average							1	0.993333	0.873333	0.8	0.746667	0.706667
		Standard deviation							0	0.011547	0.0305505	0.02	0.0416333	0.061101
		Standard error							0	0.00666667	0.0176383	0.011547	0.024037	0.0352767
spok_HsC>U6-dib[gR1]	Normal fly food (no 20E)	1	50	50	43	42	0	0	1	1	0.86	0.84	0	0
		2	50	46	41	39	1	0	1	0.92	0.82	0.78	0.02	0
		3	50	48	43	37	0	0	1	0.96	0.86	0.74	0	0
		Average							1	0.96	0.846667	0.786667	0.00666667	0
		Standard deviation							0	0.04	0.023094	0.0503322	0.011547	0
		Standard error							0	0.023094	0.0133333	0.0290593	0.00666667	0
	Normal fly food + 20E	1	50	44	43	40	37	37	1	0.88	0.86	0.8	0.74	0.74
		2	50	48	42	40	39	35	1	0.96	0.84	0.8	0.78	0.7
		3	50	48	44	38	38	36	1	0.96	0.88	0.76	0.76	0.72
		Average							1	0.933333	0.86	0.786667	0.76	0.72
		Standard deviation							0	0.046188	0.02	0.023094	0.02	0.02
		Standard error							0	0.0266667	0.011547	0.0133333	0.011547	0.011547
spok_dFC>U6-dib[gR2]	Normal fly food (no 20E)	1	50	50	47	43	0	0	1	1	0.94	0.86	0	0
		2	50	49	46	44	1	0	1	0.98	0.92	0.88	0.02	0
		3	50	50	48	44	0	0	1	1	0.96	0.88	0	0
		Average							1	0.993333	0.94	0.873333	0.00666667	0
		Standard deviation							0	0.011547	0.02	0.011547	0.011547	0
		Standard error							0	0.00666667	0.011547	0.00666667	0.00666667	0
	Normal fly food + 20E	1	50	50	48	44	42	40	1	1	0.96	0.88	0.84	0.8
		2	50	50	47	47	44	41	1	1	0.94	0.94	0.88	0.82
		3	50	50	46	45	44	44	1	1	0.92	0.9	0.88	0.88
		Average							1	1	0.94	0.906667	0.866667	0.833333
		Standard deviation							0	0	0.02	0.0305505	0.023094	0.0416333
		Standard error							0	0	0.011547	0.0176383	0.0133333	0.024037
act-Cas9.P2>U6-dib[gR1]	Normal fly food (no 20E)	1	50	0	0	0	0	0	1	0	0	0	0	0
		2	50	0	0	0	0	0	1	0	0	0	0	0
		3	50	0	0	0	0	0	1	0	0	0	0	0
		Average							1	0	0	0	0	0
		Standard deviation							0	0	0	0	0	0
		Standard error							0	0	0	0	0	0
	Normal fly food + 20E	1	50	38	36	35	32	28	1	0.76	0.72	0.7	0.64	0.56
		2	50	36	33	28	25	24	1	0.72	0.66	0.56	0.5	0.48
		3	50	38	37	35	31	29	1	0.76	0.74	0.7	0.62	0.58
		Average							1	0.746667	0.706667	0.653333	0.586667	0.54
		Standard deviation							0	0.023094	0.0416333	0.080829	0.0757188	0.052915
		Standard error							0	0.0133333	0.024037	0.0466667	0.0437163	0.0305505
spok_dI>dib[TSS-110]	Normal fly food (no 20E)	1	50	50	46	45	0	0	1	1	0.92	0.9	0	0
		2	50	50	47	41	2	0	1	1	0.94	0.82	0.04	0
		3	50	48	42	38	1	0	1	0.96	0.84	0.76	0.02	0
		Average							1	0.986667	0.9	0.826667	0.02	0
		Standard deviation							0	0.023094	0.052915	0.0702377	0.02	0
		Standard error							0	0.0133333	0.0305505	0.0405518	0.011547	0
	Normal fly food + 20E	1	50	50	49	46	44	41	1	1	0.98	0.92	0.88	0.82
		2	50	47	45	44	41	36	1	0.94	0.9	0.88	0.82	0.72
		3	50	50	47	43	38	37	1	1	0.94	0.86	0.76	0.74
		Average							1	0.98	0.94	0.886667	0.82	0.76
		Standard deviation							0	0.034641	0.04	0.0305505	0.06	0.052915
		Standard error							0	0.02	0.023094	0.0176383	0.034641	0.0305505
spok_dI>dib[TSS-482]	Normal fly food (no 20E)	1	50	50	47	42	0	0	1	1	0.94	0.84	0	0
		2	50	48	48	43	0	0	1	0.96	0.96	0.86	0	0
		3	50	48	45	42	0	0	1	0.96	0.9	0.84	0	0
		Average							1	0.973333	0.933333	0.846667	0	0
		Standard deviation							0	0.023094	0.0305505	0.011547	0	0
		Standard error							0	0.0133333	0.0176383	0.00666667	0	0
	Normal fly food + 20E	1	50	50	46	41	37	35	1	1	0.92	0.82	0.74	0.7
		2	50	50	42	37	35	31	1	1	0.84	0.74	0.7	0.62
		3	50	50	46	43	42	39	1	1	0.92	0.86	0.84	0.78
		Average							1	1	0.893333	0.806667	0.76	0.7
		Standard deviation							0	0	0.046188	0.061101	0.072111	0.08
		Standard error							0	0	0.0266667	0.0352767	0.0416333	0.046188
act-Cas9.P2>PG1_dib[gR1]	Normal fly food (no 20E)	1	50	49	46	42	0	0	1	0.98	0.92	0.84	0	0
		2	50	50	48	43	0	0	1	1	0.96	0.86	0	0
		3	50	50	43	37	0	0	1	1	0.86	0.74	0	0
		Average							1	0.993333	0.913333	0.813333	0	0
		Standard deviation							0	0.011547	0.0503322	0.064291	0	0
		Standard error							0	0.00666667	0.0290593	0.0371184	0	0
	Normal fly food + 20E	1	50	47	43	41	39	37	1	0.94	0.86	0.82	0.78	0.74
		2	50	49	45	42	40	39	1	0.98	0.9	0.84	0.8	0.78
		3	50	48	45	44	38	38	1	0.96	0.9	0.88	0.76	0.76
		Average							1	0.96	0.886667	0.846667	0.78	0.76
		Standard deviation							0	0.02	0.023094	0.0305505	0.02	0.02
		Standard error							0	0.011547	0.0133333	0.0176383	0.011547	0.011547
act-Cas9.P2>PG2_dib[gR1]	Normal fly food (no 20E)	1	50	49	47	44	0	0	1	0.98	0.94	0.88	0	0
		2	50	50	45	41	0	0	1	1	0.9	0.82	0	0
		3	50	48	47	43	0	0	1	0.96	0.94	0.86	0	0
		Average							1	0.98	0.926667	0.853333	0	0
		Standard deviation							0	0.02	0.023094	0.0305505	0	0
		Standard error							0	0.011547	0.0133333	0.0176383	0	0
	Normal fly food + 20E	1	50	50	47	45	44	40	1	1	0.94	0.9	0.88	0.8
		2	50	49	45	40	40	36	1	0.98	0.9	0.8	0.8	0.72
		3	50	47	46	46	42	40	1	0.94	0.92	0.92	0.84	0.8
		Average							1	0.973333	0.92	0.873333	0.84	0.773333
		Standard deviation							0	0.0305505	0.02	0.064291	0.04	0.046188
		Standard error							0	0.0176383	0.011547	0.0371184	0.023094	0.0266667
act-Cas9.P2>PG3_dib[gR1]	Normal fly food (no 20E)	1	50	50	47	45	0	0	1	1	0.94	0.9	0	0
		2	50	49	43	43	0	0	1	0.98	0.86	0.86	0	0
		3	50	48	44	41	0	0	1	0.96	0.88	0.82	0	0
		Average							1	0.98	0.893333	0.86	0	0
		Standard deviation							0	0.02	0.0416333	0.04	0	0
		Standard error							0	0.011547	0.024037	0.023094	0	0
	Normal fly food + 20E	1	50	48	47	42	42	39	1	0.96	0.94	0.84	0.84	0.78
		2	50	46	44	43	41	41	1	0.92	0.88	0.86	0.82	0.82
		3	50	50	48	44	40	37	1	1	0.96	0.88	0.8	0.74
		Average							1	0.96	0.926667	0.86	0.82	0.78
		Standard deviation							0	0.04	0.0416333	0.02	0.02	0.04
		Standard error							0	0.023094	0.024037	0.011547	0.011547	0.023094
phm[E7] mutant	Normal fly food (no 20E)	1	50	0	0	0	0	0	1	0	0	0	0	0
		2	50	0	0	0	0	0	1	0	0	0	0	0
		3	50	0	0	0	0	0	1	0	0	0	0	0
		Average							1	0	0	0	0	0
		Standard deviation							0	0	0	0	0	0
		Standard error							0	0	0	0	0	0
	Normal fly food + 20E	1	50	27	26	23	21	19	1	0.54	0.52	0.46	0.42	0.38
		2	50	28	27	24	24	21	1	0.56	0.54	0.48	0.48	0.42
		3	50	25	22	20	19	17	1	0.5	0.44	0.4	0.38	0.34
		Average							1	0.533333	0.5	0.446667	0.426667	0.38
		Standard deviation							0	0.0305505	0.052915	0.0416333	0.0503322	0.04
		Standard error							0	0.0176383	0.0305505	0.024037	0.0290593	0.023094
phm22>phm-RNAi	Normal fly food (no 20E)	1	50	49	0	0	0	0	1	0.98	0	0	0	0
		2	50	49	0	0	0	0	1	0.98	0	0	0	0
		3	50	50	0	0	0	0	1	1	0	0	0	0
		Average							1	0.986667	0	0	0	0
		Standard deviation							0	0.011547	0	0	0	0
		Standard error							0	0.00666667	0	0	0	0
	Normal fly food + 20E	1	50	50	46	41	39	37	1	1	0.92	0.82	0.78	0.74
		2	50	48	45	42	40	38	1	0.96	0.9	0.84	0.8	0.76
		3	50	49	43	39	38	35	1	0.98	0.86	0.78	0.76	0.7
		Average							1	0.98	0.893333	0.813333	0.78	0.733333
		Standard deviation							0	0.02	0.0305505	0.0305505	0.02	0.0305505
		Standard error							0	0.011547	0.0176383	0.0176383	0.011547	0.0176383
spok_DmC>U6-phm[gR1]	Normal fly food (no 20E)	1	50	50	0	0	0	0	1	1	0	0	0	0
		2	50	47	0	0	0	0	1	0.94	0	0	0	0
		3	50	49	0	0	0	0	1	0.98	0	0	0	0
		Average							1	0.973333	0	0	0	0
		Standard deviation							0	0.0305505	0	0	0	0
		Standard error							0	0.0176383	0	0	0	0
	Normal fly food + 20E	1	50	48	45	41	40	37	1	0.96	0.9	0.82	0.8	0.74
		2	50	50	45	42	37	36	1	1	0.9	0.84	0.74	0.72
		3	50	47	44	38	37	35	1	0.94	0.88	0.76	0.74	0.7
		Average							1	0.966667	0.893333	0.806667	0.76	0.72
		Standard deviation							0	0.0305505	0.011547	0.0416333	0.034641	0.02
		Standard error							0	0.0176383	0.00666667	0.024037	0.02	0.011547
spok_HsC>U6-phm[gR1]	Normal fly food (no 20E)	1	50	47	0	0	0	0	1	0.94	0	0	0	0
		2	50	49	0	0	0	0	1	0.98	0	0	0	0
		3	50	50	0	0	0	0	1	1	0	0	0	0
		Average							1	0.973333	0	0	0	0
		Standard deviation							0	0.0305505	0	0	0	0
		Standard error							0	0.0176383	0	0	0	0
	Normal fly food + 20E	1	50	50	45	41	38	37	1	1	0.9	0.82	0.76	0.74
		2	50	48	44	42	40	37	1	0.96	0.88	0.84	0.8	0.74
		3	50	49	48	44	43	41	1	0.98	0.96	0.88	0.86	0.82
		Average							1	0.98	0.913333	0.846667	0.806667	0.766667
		Standard deviation							0	0.02	0.0416333	0.0305505	0.0503322	0.046188
		Standard error							0	0.011547	0.024037	0.0176383	0.0290593	0.0266667
spok_dFC>U6-phm[gR2]	Normal fly food (no 20E)	1	50	50	0	0	0	0	1	1	0	0	0	0
		2	50	47	0	0	0	0	1	0.94	0	0	0	0
		3	50	48	0	0	0	0	1	0.96	0	0	0	0
		Average							1	0.966667	0	0	0	0
		Standard deviation							0	0.0305505	0	0	0	0
		Standard error							0	0.0176383	0	0	0	0
	Normal fly food + 20E	1	50	50	47	44	41	39	1	1	0.94	0.88	0.82	0.78
		2	50	48	45	43	43	41	1	0.96	0.9	0.86	0.86	0.82
		3	50	49	47	42	38	37	1	0.98	0.94	0.84	0.76	0.74
		Average							1	0.98	0.926667	0.86	0.813333	0.78
		Standard deviation							0	0.02	0.023094	0.02	0.0503322	0.04
		Standard error							0	0.011547	0.0133333	0.011547	0.0290593	0.023094
spok_dI>phm[TSS-174]	Normal fly food (no 20E)	1	50	50	48	45	0	0	1	1	0.96	0.9	0	0
		2	50	49	46	42	5	1	1	0.98	0.92	0.84	0.1	0.02
		3	50	49	47	41	0	0	1	0.98	0.94	0.82	0	0
		Average							1	0.986667	0.94	0.853333	0.0333333	0.00666667
		Standard deviation							0	0.011547	0.02	0.0416333	0.057735	0.011547
		Standard error							0	0.00666667	0.011547	0.024037	0.0333333	0.00666667
	Normal fly food + 20E	1	50	47	43	41	38	35	1	0.94	0.86	0.82	0.76	0.7
		2	50	46	44	40	35	32	1	0.92	0.88	0.8	0.7	0.64
		3	50	48	46	41	37	34	1	0.96	0.92	0.82	0.74	0.68
		Average							1	0.94	0.886667	0.813333	0.733333	0.673333
		Standard deviation							0	0.02	0.0305505	0.011547	0.0305505	0.0305505
		Standard error							0	0.011547	0.0176383	0.00666667	0.0176383	0.0176383
spok_dI>phm[TSS-423]	Normal fly food (no 20E)	1	50	48	45	42	12	3	1	0.96	0.9	0.84	0.24	0.06
		2	50	49	42	37	17	7	1	0.98	0.84	0.74	0.34	0.14
		3	50	47	47	42	14	5	1	0.94	0.94	0.84	0.28	0.1
		Average							1	0.96	0.893333	0.806667	0.286667	0.1
		Standard deviation							0	0.02	0.0503322	0.057735	0.0503322	0.04
		Standard error							0	0.011547	0.0290593	0.0333333	0.0290593	0.023094
	Normal fly food + 20E	1	50	50	47	42	41	41	1	1	0.94	0.84	0.82	0.82
		2	50	48	47	41	40	39	1	0.96	0.94	0.82	0.8	0.78
		3	50	50	45	43	41	39	1	1	0.9	0.86	0.82	0.78
		Average							1	0.986667	0.926667	0.84	0.813333	0.793333
		Standard deviation							0	0.023094	0.023094	0.02	0.011547	0.023094
		Standard error							0	0.0133333	0.0133333	0.011547	0.00666667	0.0133333
